# Supplementary material for: Bright Light Therapy for Major Depressive Disorder in Adolescent Outpatients: A Preliminary Study
Source: MDPI journal article supplement (doi:10.3390/clockssleep6010005), 2024-01-30
Supplement: s1 [file s1]

**Table S1.** Schedule of Assessments.

| Construct               | Measure                                                                           | Completed by: | Baseline | Weekly     | Every<br>2<br>weeks | End<br>of<br>study |
|-------------------------|-----------------------------------------------------------------------------------|---------------|----------|------------|---------------------|--------------------|
| <b>SCREENING</b>        |                                                                                   |               |          |            |                     |                    |
| Depression              | Patient Health Questionnaire-9 or -2                                              | Y             |          |            |                     |                    |
| <b>ELIGIBILITY</b>      |                                                                                   |               |          |            |                     |                    |
| Major Depression        | MINI-KID                                                                          | P/Y           | X        |            |                     |                    |
| Seasonality             | Seasonal Pattern Assessment Questionnaire (SPAQ)                                  | Y             | X        |            |                     |                    |
| <b>PRIMARY OUTCOMES</b> |                                                                                   |               |          |            |                     |                    |
| Depression              | Short Mood and Feelings Questionnaire (SMFQ)                                      | P/Y           | X        | X          |                     |                    |
| Suicide                 | Columbia Suicide Severity Scale (CSSS)                                            | Y             | X        | X          |                     |                    |
| Severity                | Clinical Global Impressions - Severity and Improvement (CGI-S, I)                 | C             | X        |            | X                   |                    |
| Mania                   | Brief Child Mania Rating Scale (CMRS)                                             | P             | X        |            | X                   |                    |
| Side effects            | Systematic Assessment for Treatment Emergent Effects (SAFTEE, modified, 26-items) | Y             | X        | X          |                     |                    |
| <b>COVARIATES</b>       |                                                                                   |               |          |            |                     |                    |
| Sleep                   | Medical Outcomes Study Sleep Scale                                                | Y             | X        |            | X                   |                    |
| Anxiety                 | Screen for Child Anxiety Related Disorders (SCARED)                               | P/Y           | X        |            |                     | X                  |
| Chronotype              | Morningness-Eveningness Questionnaire                                             | Y             | X        |            |                     |                    |
| Process                 | Expectations/perceived effectiveness of treatment                                 | Y             | X        |            |                     | X                  |
| Sleep, activity, light  | Actigraphy data from watch                                                        | Device        |          | continuous |                     |                    |

P = parent, Y = youth, C = clinician
